# Supplementary material for: Dual oxidase Duox and Toll-like receptor 3 TLR3 in the Toll pathway suppress zoonotic pathogens through regulating the intestinal bacterial community homeostasis in Hermetia illucens L
Source: PubMed Central journal article supplement (PMC7192390; doi:10.1371/journal.pone.0225873), 2020-04-30
Supplement: pone.0225873.s001.pdf [file pone.0225873.s001.pdf]

Figure S1

ATGGATGTTCTTGTTGGAAGATAGTTCTCTTGCTCGTCCGGAGTCATAAGATTTACAGAA  
M D V P C W K I V L L L V G V I R F T E  
CCGACCGACGTTCTACC AAATGAACTGGCTTTAGTCGAATAGAAAA GCAACGATACGAT  
P T D V L P N E T G F S R I E K Q R Y D  
GGCTGGTACAACAATTTGGCTCATCCAGATTGGGGATCTGTTGACAGT CACCTGGTCCGA  
G V Y N N L A H P D V G S V D S H L V R  
AAGGCACCCCTGCATA TTCCGATGGGGTTTATGCCTTAGCAGGTAT CAACCGACCATCA  
K A P P A Y S D G V Y A L A G I N R P S  
CCGCGACGATTGATGCG TCTTTTTATGCGGGTCAAGATGGCTTAGG CTCCAAAACAAAT  
P R R L S R L F M R G Q D G L G S K T N  
AGGACCGCCCTACTTGC ATTCTTCGGGCAGGTGGTAGCCAACGAAAT CGTTATGGCTTCC  
R T A L L A F F Q G V V A N E I V N A S  
GAATCTGGTTGTCCCAT AGAAATGCACTGAATTGACATTGAAAAATG CGATGATATGTAC  
E S G C P I E M H R I D I E K C D D M Y  
GACAAAGAATGTCGAGG AAATCGTTATATTCCATTCTTGAGAGCGGC ATATGATCGAGAT  
D K E C R G N R Y I P F L R A A Y D R D  
ACTGGACAGAGCCCAAA TGCTCCAAGAGAACAGGTGAACCAAATGACT GCTTGGATTGAT  
T G Q S P N A P R E C E N Q M T A V I D  
GGCAGTTTCATCTATAG TACGTCCGAGGCATGGCTGAATGCTATGCG ATCATTCCAGAAT  
G S F I Y S T S E A V L N A M R S F Q N  
GGTTCGTTGCTGACCGA GAAGGAAGGTGCGCATGCCAATCAGGAACAC AATGCGAGTTCCA

G S L L T E K E G R N P I R N T M R V P  
CTTTTCAATCATCCACT ACCGCATGTGATGAGGACCTTAAGTCCGGA GCGATTATTCTTA  
L F N H P L P H V M R T L S P E R L F L  
CTCGGTGACCCGCGAAC TAATCAAATCCTGCTCTTCTCTCATTCCGG GATCCTGTTCCCTC  
L G D P R T N C N P A L L S F G I L F L  
CGATGGCATAAACAATTT GCCGAAACGTATTAACGCCAACATCCCGA CTGGAGTGACGAA  
R V H N T L A K R I K R Q H P D W S D E  
GACATATTCAGCGAAT CCGTCCGATTGTTATAGCTAGTCTTCAAAA TATAATTTTTTAT  
D I F C R T R R I V I A S L Q N I I F N  
GAATATTTGCCGGAATT TTTGGGCTCTAAAATGCCTGAATATACGGGGTACAACCAAGAT  
E Y L P E F L G S K M P E Y T G Y N Q D  
GTCCATCCTGGCGTTGG TCATCTTTTCCAAGCGGCAGCTTTCCGATT TGGTCATACCATG  
V H P G V G H L F Q A A A F R F G H T N  
ATACCACCAGGAATTTA CAGACGTGACGCTAAGTGCAACTTTAGGAA AACGTCCATGGGG  
I P P G I Y R R D A K C N F R K T S N G  
TATCCGGCTATGCGTCT GTGTTCCGACTTGGTGGGATTGCAATGACTT TCTGGCCAAAGTCA  
Y P A N R L C S T W V D S N D F L A K S  
TCAGTCGAAGAGATCCT TATGGGTCTTTCATCGCAAATTTCCGAGCGA GAGGCATCCGGTA  
S V E E I L M G L S S Q I S E R E D P V  
CTATGCTCCGATGTGCG CGATAAGCTGTTCCGGTCCGATGGAGTTACAC AAGAAGAGATTTG  
L C S D V R D K L F G P M E F T R R D L  
GGAGCTTTGAACATTAT GCGAGGAAGAGATAATGGACTCCCTGATTA T AACACAGCACGT

G A L N I M R G R D N G L P D Y N T A R  
G A A G C C C T A G G A C T A T C A A A A A G G A A A A C C T G G G A A G A G A T C A A T C C A G A A C T A T T T A A G  
E A L G L S K R K T V E E I N P E L F K  
G C T A A G C C G G A A T T A T T A A A A G C T C T A A T T T C C G T T T A C A A C A A C C A A T T G C A C A A C A T T  
A K P E L L K A L I S V Y N N Q L D N I  
G A C G T C T A C G T A G G C G G T A T G C T G G A A T C C T A C G G A G G T C C T G G C G A A C T A T T C A C G G C T  
D V Y V G G M L E S Y G G P G E L F T A  
G T C A T C A A G G A A C A A T T C A T T C G A A T C C G A G A T G C T G A C C G A T T C T G G T T C C A G A A T A A T  
V I K E Q F I R I R D A D R F W F E N N  
C G C A G C A A T A T G T T C A C C G C T G A A G A A A T C G C A G A A C T T C G C A A G A T C A C C C T T T G G G A C  
R S N M F T A E E I A E L R K I T L V D  
G T G A C C G T C A A C A G C A C C G A C A T A A A A C C A G G T G A C A T C C A G A A G A A C G T A T T C A T G T G G  
V I V N S T D I K P G D I Q K N V F N V  
C A T A A A A A T G A T C C C T G C C C G C A A C C A A T G C A G C T A A A C G C T T C T G A G T T A G A A C C A T G C  
H K N D P C P Q P M Q L N A S E L E P C  
A G C T A C T T G C A A G G A T A T G A T T A T T T C T C A G G A T C A G A G C T G A C T T T C A T T T A T G C C T G T  
S Y L Q G Y D Y F S G S E L T F I Y A C  
G T C T T C C T T G G T T T T G T T C C G A T A T T G C T C G C T G G A G C A G G A T A T T G T G T T C T A A A G T T A  
V F L G F V P I L L A G A G Y C V V K L  
C A A A A C A G C A A A C G A A G G A A A C T G A A G A T A C G C C A G G A A G C A A T T A A G T C C A G T C C T C A A  
Q N S K R R K L K I R Q E A I K S S A Q

CATAAAGGATCTGTGGATAAGAT GATAGCGCGGGAATGGTTGCATGCTAATCACAAGCGA  
H K G S V D K M I A R E V L H A N H K R  
TTGGTTACTGTGAAATTTGGTCC TGAAGCTGCAATATACACAGTCGACCGTAAAGGCGAG  
L V T V K F G P E A A I Y T V D R K G E  
AAATTAAGGACATTTTGTGAA AAATGTGATTTGGTCACCGTGAAGAATCTCAAATA  
K L R T F C L K N V D L V T V E E S Q I  
ACAAATTTAAGGAAGAAACCATA TCTCCTGATAAGAATTCATAACGATCATGATTTGGTG  
T N L R K K P Y L L I R I H N D H D L V  
CTTGAATTAGATTCAGTGAATTC TCGAAGGAAGTTTATCAAGAAATTAGAAGATTTCCCTG  
L E L D S V N S R R K F I K K L E D F L  
CTGCTACATAAAGAGAGTTGAC TGTAATTGAGGTTCCCTAAAGACATCATGCTGACTCGT  
L L H K R E L T V I E V P K D I M L T R  
GCGGAAACTCGAGAAAGAAGACA AAAGCGTCTGGAATACTTCTTCAGAGAAGCATATGCC  
A E T R E R R Q K R L E Y F F R E A Y A  
CTTACCTTCGGCCCTAAAACCTGG CGAGCGCAGACGCCGTTTCCAGACACCTCAGCCGATGGC  
L T F G L K P G E R R R R S D T S A D G  
GAAGTCATGACCGTCATGCCAAC TAGCCTTTCCACTGCCGAATTCGCCGCGAGCGCTCGGG  
E V N T V N R T S L S T A E F A A A L G  
ATGAAATCAAACGACATGTTTGT TCGAAAAATGTTCAATATTGTTGACAAGGATCAAGAC  
M K S N D N F V R K N F N I V D K D Q D  
GGACGAATATCCTTCCAAGAGTT CCTGGAGACTGTAGTACTATTTTCACGAGCGAAGACC  
G R I S F Q E F L E T V V L F S R C K T  
GAGGATAAGTTCCGAATCATTTT TGATATGTGTGATAATGATCGGAATGGAGTAATAGAC

E D K L R I I F D N C D N D R N G V I D  
AAGGAAGAAGCTGAGCGAAATGAT GCGATCCTTGGTAGAGATTGCAAGAACCCTAGTCTT  
K E E L S E M M R S L V E I A R T T S L  
AGGGATGACCAGGTTACCGAGCT CATTGACGGAATGTTCCAGGATGTAGGCTTGGAGCAT  
R D D Q V T E L I D G N F Q D V G L E H  
AAGAACCATTTGACTTACCAAGA CTTTAAGCTTATGATGAAGGAGTATAAGGGAGACTTT  
K N H L T Y Q D F K L M N K E Y K G D F  
GTCGCGATCGGGCTGGATTGCAA AGGAGCGAAACAAAATTTCTTGGATACATCAACGAAT  
V A I G L D C K G A K Q N F L D T S T N  
ATCGCACGAATGACGTCGTTTCA TATTGAACCTGTGCAGGATATTCATCGACATTGGCTG  
I A R N T S F H I E P V Q D I H R H V L  
CAGAAGCAATGGGATAGTTACAC AACTTTCTTGGAAAGAGAATAGACAAAATATCTTTTAT  
Q K C V D S Y T T F L E E N R Q N I F Y  
TTATTTTTATTTTATGTGATCAC GATCGTACTATTTGTTGAGAGGTTTCATACATTACTCC  
L F L F Y V I T I V L F V E R F I H Y S  
TTTATGGCTGAGCATACTGATCT GAGGCATATTATGGGAGTGGGCATTGCGATAACTCGT  
F M A E H T D L R H I M G V G I A I T R  
GGATCGGCTGCATCACTATCATT TTGCTACTCTCTGTTACTGCTAACAATGTCGAGAAAT  
G S A A S L S F C Y S L L L L T N S R N  
CTAATAACAAAAGCTGAAAGAGTT CCCGATCCAACAATACATCCCCTTGGACTCTCATATC  
L I T K L K E F P I Q Q Y I P L D S H I  
CAGTTCATAAAAATCGCCGCTGT TACAGCCCTGTTTTCTCGCTCCTCCATACAGTCGGT  
Q F H K I A A C T A F L F S L L H T V G  
CACATAGTGAATTTCTATCATGT TTCGACCCAATCCGTTGAAAATCTTCACTGCCTCACA  
H I V N F Y H V S T Q S V E N L H C L T  
AGAGAAGTTCACTTCGCGTCCGA CTATAAGCCTGATCTGACCTTCTGGTTGTTCCAAACA

R E V H F A S D Y K P D L T F W L F Q T  
GTTACTGGTCTAACCGGTGTCCT TCTCTTCATCATAATGGCAGCGATCTTCGTTTTCGCC  
V T G L T G V L L F I I N A A I F V F A  
CATCCGACCATCAGGAAGAAGGC ATACAAATCTTCTGGAACGTTTCATGCTCTATATATC  
H P T I R K K A Y K F F V N V H A L Y I  
CTGCTTTATATTTTGTGTTTGT TCATGGGCTGGCGAGACTTACAGGACCACCGAGATTC  
L L Y I L C L I H G L A R L T G P P R F  
TGGATGTTCTTCATTGGACCGGG AATTATTTACACCTTGGATAAGATCGTCTCACTACGT  
W M F F I G P G I I Y T L D K I V S L R  
ACAAAATACATGGCTCTAGACGT CATGGAAACCGATCTTCTCCCATCCGACGTGATCAAA  
T K Y N A L D V N E T D L L P S D V I K  
AT CAAGTTCTACCGTCCGCCCAATCTAAAATACCTCTCCGGACAATGGGTTCCGTCTATCC  
I K F Y R P P N L K Y L S G Q W V R L S  
TG CACGGCCTTGGACCAACCGAAATGCATAGCTTTACTCTTACATCTGCTCCACATGAA  
C T A L R P T E N H S F T L T S A P H E  
AA CTTCCTAAGCTGCCATATCAAGGCGCAAGGACCATGGACATGGAA GCTTCGGAAGCTAT  
N F L S C H I K A C G P W T W K L R N Y  
TT CGATCCGTGCAACTACAACCCGGAGGATCAACCGAAAATCCGTAT CGAAGGTCCCTTT  
F D P C N Y N P E D Q F K I R I E G P F  
GG TCTCACTCCATATGCATCGATTCTCAACGATTTGGTATTTGGAAGTAGCACGAATCGG  
G V T P Y A S I L N D L V F G T S T N R  
TA CTCAGGAGTGGCTTGAAGAAGGTCTACTTCTTGTGGATTTGTCCGTCCGATAAGCAT  
Y S G V A C K K V Y F L W I C P S H K H  
TT CGAATGGTTCATCGATGTTTTGCGCCATGTTGAGAAGAAGGATGT TACCAATGTATTA  
F E W F I D V L R D V E K K D V T N V L  
GA AATTCATATTTTCATAACACAATTTTCCATAAATTCGATTTAAGGACTACAATGCTG

E I H I F I T Q F F H K F D L R T T N L  
TA TATTTGTGAAAACCACTTCCAGAGGTTGGCTAAAACCTTCAATATTTACGGGACTTAAG  
Y I C E N H F Q R L A K T S I F T G L K  
GC TGTTAACCATTTTGGACGCCCTGATATGTCGAGCTTCTCAAGTTTCTTCCAGAAGAAA  
A V N H F G R P D N S S F L K F V Q K K  
CA TTCATATGTCTCAAAAATTTGGTGTATTCTCCTGTGGACCGCGCCC CTTAACCAAGAGT  
H S Y V S K I G V F S C G P R P L T K S  
GT AATGTCCGCATGTGATGAAGTGAACAAAGGACCGCAAGTTACCATATTTCAATCACCAT  
V M S A C D E V N K G R K R P Y F I H H  
TT CGAGAAGCTTTGGTTAG  
F E N F G
